# Supplementary material
Source: MDPI journal article supplement (https://www.mdpi.com/1999-4907/13/5/781)
Supplement: s1 [file s1]

Figure 1 displays the multiple sequence alignment of the JAZ1 protein from various species, including *Gibberella zeae* (Gb), *Psidium cattleianum* (Ps), *Phytophthora infestans* (Ph), *Phytophthora sojae* (Pso), *Phytophthora blight* (Pb), *Phytophthora capsici* (Pca), *Phytophthora ramblensis* (Pra), *Phytophthora sojae* (Pso), *Phytophthora blight* (Pb), *Phytophthora capsici* (Pca), *Phytophthora ramblensis* (Pra), *Phytophthora sojae* (Pso), *Phytophthora blight* (Pb), *Phytophthora capsici* (Pca), and *Phytophthora ramblensis* (Pra). The alignment is shown in three blocks, with the first block (1-120) and the second block (121-240) highlighted in red. The third block (241-360) is shown in black. The consensus sequence is provided at the bottom of each block. The alignment shows high conservation of the JAZ1 protein across the species, with the first block (1-120) and the second block (121-240) being highly conserved. The third block (241-360) shows more variation, particularly in the C-terminal region.

1 120 240 360 424

|           |       |                                                                                                                          |                              |                                           |
|-----------|-------|--------------------------------------------------------------------------------------------------------------------------|------------------------------|-------------------------------------------|
| GbJAZ05   | (1)   | MSRDQAVAMDFLGVKSSGKNEGETDPNSVISQTKQECLANEETVKSSSETATGSEATKTSSAPGQTMKSDFSQAFSLFSKYFREKGNANAVMGAQENFNLGKPLEQQTNEDV         | K                            | GSKPAKD                                   |
| GbJAZ10   | (1)   | -----                                                                                                                    |                              |                                           |
| PsJAZ01   | (1)   | MSQDQAVAMDFLGVKSGVKKESQTDENPVTAQSKQE-----PVATEQMTSPAASAPSEGSTMNFSQAFSLFSKHFNEKGNGNAAIGRGENVYLGN-----GKEDV                | K                            | GSKPVNE                                   |
| TcJAZ01   | (1)   | -----                                                                                                                    |                              | MTHMNQEKSGIMQMF                           |
| TcJAZ02   | (1)   | -----                                                                                                                    |                              | MTKERSDIMQMF                              |
| PsJAZ11   | (1)   | -----                                                                                                                    |                              | MGLVVSTKL                                 |
| PsJAZ07   | (1)   | -----                                                                                                                    |                              |                                           |
| PsJAZ13   | (1)   | -----MVKVVAAMDFLGLSEKEKSELTKGNSNSEGIQKDQTEMNAVVTASTDKAQWNNNNAMRSDGSFKNRFCE                                               | K                            | GSFTSQL                                   |
| Consensus | (1)   |                                                                                                                          |                              | K                                         |
|           |       | 121                                                                                                                      |                              | 240                                       |
| GbJAZ05   | (121) | D-VSTQLGLFPQQTGFGSHLRPLILGTDHKIVAPTASQPWPFRLQA-----S-----N-SPAMRSIVTSTTTQTVKPPTAQLTIFYAGMVSVYDDM                         |                              |                                           |
| GbJAZ10   | (1)   | --MPPPERVIVSAGFGSPLRPLILGTDHKIVAPTASQPWPFRLQA-----S-----N-SPAMRSIVTSATTQTVKPPTAQLTIFYAGMVNVYDDM                          |                              |                                           |
| PsJAZ01   | (105) | ENVSTQLGLFSQSGFGS-LRPFPGAQKGFASSTTAQWLFRLGILP-----P-----N-SPAMRPAVTS-TPPIKPPTAQLTIFYAGMVNVYDDV                           |                              |                                           |
| TcJAZ01   | (16)  | GQQCAMDQDSSQKSGFGSVPLPVAAGFQHRKPHLQGLFPMFR-----P-----AGKEARG--AQLTIFYGGMNVYDDI                                           |                              |                                           |
| TcJAZ02   | (13)  | VQQCAMDQDSTQKSGFGS-PVAATAEVQHRNLHLHPLFRSAG-----C-----AVAQKSGSAQLTIFYGGMNVYDDI                                            |                              |                                           |
| PsJAZ11   | (10)  | KLGTAFEEQCDEETGLPSWITSVNGGAKRAVADCISR-----LA-----PS-MIPEKPSSAKLSIFYGGTVYIYDDI                                            |                              |                                           |
| PsJAZ07   | (1)   | -MASAFEHCNQEKGLPSWIKTVNGGAKRAAADFIPR-LDLSVVGSCFNSIHLFPNQSGFGSPIAVLPDSEHRTSSDDHQDGCSGFVTSFRPAASTIPSKQSCAQLTIFYGGVNVYDDI   |                              |                                           |
| PsJAZ13   | (80)  | RDGLAFEHCDEEKSPSWIRTVNGVAKRSVADCIPRLDLNVGSSSNLINLFPDQSGFGSPIAVKGGFDHRTS-DNDGDGCSGFVTSFRPTASMSISGKQSCAQLTIFYGGTVNVYDDI    |                              |                                           |
| Consensus | (121) | SAEEQSGFGSIRPVGGKVASPFRLLA                                                                                               | SMSASTKPTAQLTIFYGGMNVYDDI    |                                           |
|           |       | 241                                                                                                                      |                              | 360                                       |
| GbJAZ05   | (205) | PADKAQAIMLLADSGNPSNHKFVKAANFGQQTTPATTPPSTPLGSVTRTPVSLQITGTDDVPVPAMPSPGGPNQQTVRKLQADLPIARKNSLQRFLEKR--KDRLITKAPYATTSLANK  |                              |                                           |
| GbJAZ10   | (84)  | PADKAQAIMLLADSGNPSNHKFVKAANFGQQTTPATPLSTPLGSVTRTPVSLQISTGTDDVPVPAMPSSLGGPNQQTVRKLQADLPIARKNSLQCFLEKR--KDRLITKAPYATTSLANK |                              |                                           |
| PsJAZ01   | (187) | PADKAQAIMLLADSGNPLNASFIKANFAQQTPCVSPVSSPLSSIPTSLSLQTSQVTTTEVATPTMP--LAPNHHQPIRKQLADLPIARKHSLQRFLEKR--KDRLMTKAPYPASPAPMK  |                              |                                           |
| TcJAZ01   | (83)  | SADKAQALMLTASTG-----KPMQKNSS-YASEPQPTKSVKLSLVNSTELE-----LTVDLPIARKNSLQRFLEKR--NHRLNAKAPYTISQENPK                         |                              |                                           |
| TcJAZ02   | (81)  | SADKAQAIMLLASSG-----KPIQKNSSGGYASQPQPTK-----PDLPIARKNSLQRFLEKR--NHRLNAKAPYTISQENPK                                       |                              |                                           |
| PsJAZ11   | (76)  | PTDKAQAIMLLASSGNYS-----SYPHTKVHNGW-SQTEQKLS-VPVIKLSNGSGIHPQ----TSSPKLRTGSSDPIARKHSLQRFLEKRRDRVNAKAPYKTAEAERS             |                              |                                           |
| PsJAZ07   | (119) | PADKAQAIMLLASSENYS-----GYPHTKVQNSTCRSQTELKTS-LPVMKFSGES-----DLPIGRKHSLSQRFLEKRNKERVIANAKSPYTAADAANT                      |                              |                                           |
| PsJAZ13   | (199) | PADKAQAIMLLADSGNHS-----SYPTQLQKDCRSQITEVKISPLPLVLKQEGSRIHHQ----PAS--YKMYTDLPIARKYSLQRFLEKRNRLNAKSPYSTAAEADN              |                              |                                           |
| Consensus | (241) | PADKAQAIMLLASSGN S                                                                                                       | P TK SS SSIT TKLS L VV TTEVS | VRKL ADLPIARKNSLQRFLEKR K RLNAKAPYTTA A K |
|           |       | 361                                                                                                                      |                              | 424                                       |
| GbJAZ05   | (323) | KPDVDKLPISTKSPEN--NCLSRSTSPLPPSSRPFGCCN-----ENSTSQEASPSPIAHMA                                                            |                              |                                           |
| GbJAZ10   | (202) | KPDVSSVDSVPVPIEPKKDRCAQVGLVLVAIRPVQDLNSKLWMIGSWWLPMGADGCPLDELRL                                                          |                              |                                           |
| PsJAZ01   | (303) | SEMEESVSASPLLLSCQ-----SPSSLTSRPLSGVCCN-----ENSVTQEPSPPPVSAIYS                                                            |                              |                                           |
| TcJAZ01   | (166) | PSPCL-----                                                                                                               |                              |                                           |
| TcJAZ02   | (150) | PSPCL-----                                                                                                               |                              |                                           |
| PsJAZ11   | (177) | SIVQSECKRKVSI-----                                                                                                       |                              |                                           |
| PsJAZ07   | (205) | PKGLRS--NS--PP--ESHPPP-----                                                                                              |                              |                                           |
| PsJAZ13   | (299) | TKPRRYPSSSAIPLHSNCPR-----                                                                                                |                              |                                           |
| Consensus | (361) | S P                                                                                                                      |                              |                                           |

Figure 1. Multiple sequence alignment of the deduced protein sequences of GbJAZ9, PsJAZ4, TcJAZ5, TcJAZ7, TcJAZ6, and TcJAZ9. The alignment is shown in two parts, with the first part covering residues 1 to 120 and the second part covering residues 121 to 240. The consensus sequence is provided at the bottom of each part. The alignment is color-coded to highlight conserved regions and specific motifs. A red box highlights a conserved region in the first part of the alignment, specifically residues 100-110, which correspond to the LSLPPFDSIMRS motif. The second part of the alignment shows a conserved region around residue 230, which corresponds to the STALCPTPSTC TS motif. The consensus sequence for the first part is: (1) A A K D D DL AEEN SD K TLK GSTI GK VEVEK MRSSK GTAASM TV VR QLPNLD LSLPPFETLEL AP. The consensus sequence for the second part is: (121) QKSPF VSPS NAF FRSP K QQE QLTIFY GTV VYNVSPDLAKAIMMAAN STALCPTPSTC TS IQ LTPK.

### AVPQARK-motif

[illegible]

V(E/A)RDF(L/M)GL-motifs

|           |       |                                                                                                                            |                                                                                                                         |                             |
|-----------|-------|----------------------------------------------------------------------------------------------------------------------------|-------------------------------------------------------------------------------------------------------------------------|-----------------------------|
|           |       | 1                                                                                                                          |                                                                                                                         | 120                         |
| GbJAZ04   | (1)   | MEREKIV                                                                                                                    | ERDFMGLTNAN                                                                                                             |                             |
| PsJAZ12   | (1)   | MQRVKIV                                                                                                                    | ERDFMGLINSE                                                                                                             |                             |
| TcJAZ03   | (1)   | MDREKIV                                                                                                                    | ERDFMGLINSD                                                                                                             |                             |
| PsJAZ03   | (1)   | --MESMER                                                                                                                   | DFMGLGRRNGNEMESEKTSNNEQPHGE-----R-EKIMSLSLFQEA EKSTKLQLSSGSFCGLSEAIGKAGIANGSGKVSVPNTSMQWTYWTKAAALQQFMSFKNYQEER          |                             |
| GbJAZ11   | (1)   | MERNSLV                                                                                                                    | ARDFLGLSNRVPEKSGRDLSGLKEGELNCPTNGMQLGSA SVTKECMFGGKAGNNNNNAQVQTEADVQQREELKRYFKDK-VCLANMALQWPYSNKAAALQQFMSFKNFQEER       |                             |
| PsJAZ02   | (1)   | MERDSV                                                                                                                     | VARDFLGLSGGK-DISRGSNGSESK-----SSTSAAQVQAQSQAAQREEMKPYLKDN GVC LANISLQWPYSNKPAALEQFISFK---QEG                            |                             |
| TcJAZ08   | (1)   | MERESV                                                                                                                     | VARDFLGLNHAR--NNLSGDS-----QTQTESQRDGP IKG YFKDN-VSLANMSLQWPYSNKAAALQQFISFKNL-QEG                                        |                             |
| Consensus | (1)   | MERESTV                                                                                                                    | ERDFMGLNA                                                                                                               | V L N SLQW Y K AAL QFISFK E |
|           |       | 121                                                                                                                        |                                                                                                                         | 240                         |
| GbJAZ04   | (19)  | -----GGIEE                                                                                                                 | ADKDE---K---ATKDFNTDSTAQAGNNYP-VASGVPCRQYGVSSLVYSAGSIDGSSSSAHPIEEARGFPSSNLSLSMPNFR EHGSPAF LKGQPT                       |                             |
| PsJAZ12   | (19)  | -----VVAEK                                                                                                                 | DNELGSDS---ANKAPCQHFGVSSVAHSTG SIDGLSSSAHHIDEAGGFPPSSLSLSMSNFR EHLGFNAISKGLQA                                           |                             |
| TcJAZ03   | (19)  | -----EIADK                                                                                                                 | KEDDS-----VTKDSCTDAPVDDGSHNSLPNNDVPCQHLGTS PMAYPAGSMEGLSSSVHPVVEYGVFPSSNISLPMQNYGQHL SALAILKGQQA                        |                             |
| PsJAZ03   | (111) | PEKRKF                                                                                                                     | NQLVSSGLQPVATVDTFKSNHRSTSASQKSCNFSPISKDNAEFRNGYS-GTNCVPNQHF EVPPANFSVKAFDDQSF CNSSIEQAGAF LREKASHSPPNFR EHFSSPASFKGQDS  |                             |
| GbJAZ11   | (120) | PKKNLCDQLANS                                                                                                               | GFHP ISTADAFDISKRSTAGTQKNFNLDPSARNTAELGN YYS-GQHSP LNRHFGVSHIAYPAQALDDRGSSAYNIQEIGTYP CSNHSPSISNLGS---PAFFKGQ--         |                             |
| PsJAZ02   | (88)  | PKKSSFDQLSNS                                                                                                               | GFRP ISTADAFDLINKSAPGMQKNFNHDPMARNTIESGN YYS-GQGALSRHFGLSHITYSAHPFDEQGSSGYNMQKVGTFP CSNHSLSVSNLGS---PAYFKGE--           |                             |
| TcJAZ08   | (76)  | SKKSSFDQLSNS                                                                                                               | GVHP ISTADVFDVNNRNTTGSQAFNL DPAARNATESGN YHF-GQNGSVSRPFSVSRIMYSAKTVDDRASQGYNNQEGRAFPPSSNYSHPVSNSSSI---PAYFN GH--        |                             |
| Consensus | (121) | K QL SG PISTAD F R G QK N DP TR E GNYYS GQN P RHF                                                                          | GVSI YSA SIDD SSSAH I EAGAFPPSSN SLSMSNF HI PAFFKGQ                                                                     |                             |
|           |       | 241                                                                                                                        |                                                                                                                         | 360                         |
| GbJAZ04   | (115) | -YAATCITPPVVKPFASLPLSGQHSFFPAASTIYGGSTP-ARATDLP                                                                            | GPASAQLTIFYAGTVN VYDDVPADKAQGLMLLAGSAR--SPKVTNLPPRSSAISTTTAVGSHSMPTTPPFCS                                               |                             |
| PsJAZ12   | (109) | -TSTSCVTTSMVNP                                                                                                             | SAIQK---NSFFPAAAGVYPPSSTATSNATAVPGKQPCTQLTMFYAGTVN VYDNPVPEKAQVLMLLAASAR--SKKMTNLSPRSSAMPTSIATAVHAMPITSPFSS             |                             |
| TcJAZ03   | (113) | -VSSACGASSMANPFPIQ---HSFFPDCAGVYPTTRATSKSATIPGNP--AQLTIFYAGTVN VYDDVPADKAQGLMLLAASAR--LSKTINLPPRSSLSMMPMATGCHT PSIASPFTS   |                                                                                                                         |                             |
| PsJAZ03   | (230) | -----TAALGGKLLSSIPFTRQAPVLCGAAASTVGTTPMRADSNLPGKLASAQLTIFYAGTVN VYDNI PPDKAHAIMLSAENGSSMSTKMTDLS PQNFVMSTPVPTNSHSRPATPTICS |                                                                                                                         |                             |
| GbJAZ11   | (233) | QAMAI                                                                                                                      | ISCVTPMVKPLLGT PFAQGHSFLPVVGASTSTTIP-GATPIIPGKPANAQLTIFYAGTVN VYDEV PADKAQAIMFLAGSGNSWSGKIDNPPPQTP--AMSMPTGGHIKPAPPVC-S |                             |
| PsJAZ02   | (201) | --QAAGTTAPLMRQFQG                                                                                                          | MPLAGQHSFLPVVGASASTTIP-GAVASVSEKPAGAQLTIFYAGSVN VYDDVPADKAQAIMFLAGNGNFWSGKTATPPSQSPAMPISVATNGHARQATPIG-P                |                             |
| TcJAZ08   | (191) | --QATATSSLMAQQFQGIPLTGQHSFLPILGASASTSIL-GCGPSVPEKPAGAQLTIFYAGSVN VYDDIPADKAQAIMFMAGNGNPSSGKTATPPPQS--STISLSAIGHVKKATSVG-P  |                                                                                                                         |                             |
| Consensus | (241) | A TS MVKPF IP GQHSFLP AAS TT P G VPGKPA AQLTIFYAGTVN VYDDVPADKAQAIMLLAGSG S KM NLPPQS MSISMATG HAKPATP S                   |                                                                                                                         |                             |
|           |       | 361                                                                                                                        |                                                                                                                         | 480                         |
| GbJAZ04   | (231) | NRQNRVFPITPQAPPQKA-----QPSIQHSEPAAVTSSSGDSQVNTIIVTPSNQQEASKSSPAGITPARIIPR-VPQARKASLARFLEKRKERVHTQVPPAAKKSPDCSSQRE          |                                                                                                                         |                             |
| PsJAZ12   | (222) | KQPNRVFPMTSQAPLQKA-----QASIQPNPYSAVTLNADDSQIIQSIATSSNQQEASKSSDAGITPAPLISR AVPQARKASLARFLEKR RERIITKAPYPTKKSPDCSPQRE        |                                                                                                                         |                             |
| TcJAZ03   | (223) | SLPNQACNTTPQAPLQKP-----QENNQPNSSSTAVSLNAGDSQKNQCIVTSIGQQEASISSAMVITPVVPVPRAVPQARKASLARFLEKRKERISIKAPYPTKKSPDASPQRE         |                                                                                                                         |                             |
| PsJAZ03   | (344) | SRPNALTSMIPQGPQKSHMPIPQVHPQKSQICSKPGQSTGVSSSN GELKSNQNNGAGSNQQEGAKQMVSASTPNGVIPRALPQARKASLARFLEKRN GRVTPNLSSPTEKSPHHSSLQQ  |                                                                                                                         |                             |
| GbJAZ11   | (349) | SMSNPLPPI NVHVHPQKS-----QASIQTSQSTTVSSSAGDLQTTQMNGTPTNQQEAPKLSAAGSTPNPI MPRAVPQARKASLARFLEKRKERVCTKVYPYSKKSPEHSSHRE        |                                                                                                                         |                             |
| PsJAZ02   | (317) | RLSNALSPTNPQVHSQNS-----HATVQTSQSITAISSAGDSQTNQNNGASSNLHETPKVNAAVSTPAPIMPRAVPQARKASLARFLEKRKERVCTKAPYQTKKSFDDSSHGE          |                                                                                                                         |                             |
| TcJAZ08   | (305) | SPLNALPATNPQVDSQKSET-----TVQSQTSQSITAI FPSTGDPDANQSNVTLSNPQETP-LNASGSTPTSI MSRAVPQARKASLARFLEKRKERVITKAPYPTKKSPEDSSLSD     |                                                                                                                         |                             |
| Consensus | (361) | S N L PI PQAP QKS Q SIQ SQSTAVSSSAGDSQ NQ NGT SNQQEASK SAAGSTP PIIPRAVPQARKASLARFLEKRKERV TKAPYPTKKSPD SS RE               |                                                                                                                         |                             |
|           |       | 481                                                                                                                        |                                                                                                                         | 554                         |
| GbJAZ04   | (338) | NSQSPKRCSTSPPLDGRPSKQHKLMNG-DEKFPINSECMTSFPDRHEEEKSCFLEDEMNEREECETTVEVRS A                                                 |                                                                                                                         |                             |
| PsJAZ12   | (330) | ESPSSK--HIPPLDGCLTKQNQLISKGLDEKFPIDSESMGSFLDKDQKEHSCSLKVSCKEMGECETTVEASIL                                                  |                                                                                                                         |                             |
| TcJAZ03   | (331) | QSPSSK--HASSPLDECLTKNHQVASTGLEEKISFDS ESIG---SFQKDHSCLQKAPKIEGEDCEITV-----                                                 |                                                                                                                         |                             |
| PsJAZ03   | (464) | E---KSFSSMSSFDGCS SPQHDTVSDALHMKKLSRSDSMAHANHLTLQKAGFMLEERKIAFGTRNC-----                                                   |                                                                                                                         |                             |
| GbJAZ11   | (457) | KSLSPKHSSSLPLEDGCKSQ---QQDGS DGFVVPKSEDMADCVNKDRHEKAWSLKA EKNDIRDCEMQMT----                                                |                                                                                                                         |                             |
| PsJAZ02   | (425) | VPLSPTRSS-TPLVDGYKSQ-----RNEFMPRSEEKASCLGKEQHEQPWPPKVEKNEIKECQLQLT----                                                     |                                                                                                                         |                             |
| TcJAZ08   | (414) | KSLSPKCSS-TPPMDGCKS-----QHESMTNSEEKGSQLWQ-----                                                                             |                                                                                                                         |                             |
| Consensus | (481) | S SPK S SPPLDGC S Q L G D KFM SE MAS L K E S LK K E ECE V                                                                  |                                                                                                                         |                             |



### MERDFLG-motif

Figure 1 displays the multiple sequence alignment of the JAZ3 protein from Arabidopsis thaliana (AtJAZ3) and its orthologs from other plant species. The alignment is shown in a color-coded format, with conserved regions highlighted in yellow and variable regions in green. The alignment is divided into four segments, each starting with a position number (1, 121, 241, 361) and ending with a position number (120, 240, 360, 480). The sequences are aligned from top to bottom, with AtJAZ3 at the top and the consensus sequence at the bottom. The consensus sequence is shown in a black box. The alignment shows high conservation across the sequences, particularly in the regions highlighted in yellow.

### ELDFLGL-motif

| Species   | Accession | Residue | Sequence           |
|-----------|-----------|---------|--------------------|
| AtJAZ10   | (1)       | 1       | MSKATIELDFLGL      |
| AtJAZ10.3 | (1)       | 1       | MSKATIELDFLGL      |
| AtJAZ10.4 | (1)       | 1       | MSKATIELDFLGL      |
| OsJAZ07   | (1)       | 1       | MSTRAPV            |
| Consensus | (1)       | 1       | MSKATIELDFLGL      |
| AtJAZ10   | (117)     | 121     | QVSRNKAGEIMKVANEAA |
| AtJAZ10.3 | (117)     | 121     | QVSRNKAGEIMKVANEAA |
| AtJAZ10.4 | (117)     | 121     | QVSRNKAGEIMKVANEAA |
| OsJAZ07   | (99)      | 121     | DVSHDKAEAIMRMATEAT |
| Consensus | (121)     | 121     | QVSRNKAGEIMKVANEAA |
